# Supplementary material for: Genome-wide identification and expression analysis of tomato ADK gene family during development and stress
Source: Research Square preprint supplement (doi:10.21203/rs.3.rs-57426/v2), 2020-11-11
Supplement: Supplementary file 1 [file 40fd5e166c4ab35033dc2a5f.xlsx]

## Sheet: Sheet1
Gene name	Gene locus	CRE	CRE sequence	Start site	Length	Stand	Description
SlADK1	Solyc01g088480.3.1	CAG-motif	GAAAGGCAGAC	1453	10	-	Arabidopsis thaliana	part of a light response element
SlADK1	Solyc01g088480.3.1	Sp1	GGGCGG	1114	6	+	Oryza sativa	light responsive element
SlADK1	Solyc01g088480.3.1	G-box	CACGTC	1131	6	-	Zea mays	cis-acting regulatory element involved in light responsiveness
SlADK1	Solyc01g088480.3.1	ARE	AAACCA	895	6	-	Zea mays	cis-acting regulatory element essential for the anaerobic induction
SlADK1	Solyc01g088480.3.1	MBS	CAACTG	1007	6	-	Arabidopsis thaliana	MYB binding site involved in drought-inducibility
SlADK1	Solyc01g088480.3.1	MBS	CAACTG	1270	6	-	Arabidopsis thaliana	MYB binding site involved in drought-inducibility
SlADK1	Solyc01g088480.3.1	Box 4	ATTAAT	1291	6	-	Petroselinum crispum	part of a conserved DNA module involved in light responsiveness
SlADK1	Solyc01g088480.3.1	TCT-motif	TCTTAC	1477	6	-	Arabidopsis thaliana	part of a light responsive element
SlADK1	Solyc01g088480.3.1	Myb	CAACTG	1007	6	-	Arabidopsis thaliana
SlADK1	Solyc01g088480.3.1	Myb	CAACTG	1270	6	-	Arabidopsis thaliana
SlADK1	Solyc01g088480.3.1	ABRE	ACGTG	1132	5	+	Arabidopsis thaliana	cis-acting element involved in the abscisic acid responsiveness
SlADK2	Solyc02g093990.3.1	ERE	ATTTCATA	194	8	+	Nicotiana glutinos
SlADK2	Solyc02g093990.3.1	CGTCA-motif	CGTCA	22	5	-	Hordeum vulgare	cis-acting regulatory element involved in the MeJA-responsiveness
SlADK2	Solyc02g093990.3.1	Box 4	ATTAAT	257	6	+	Petroselinum crispum	part of a conserved DNA module involved in light responsiveness
SlADK2	Solyc02g093990.3.1	Box 4	ATTAAT	843	6	-	Petroselinum crispum	part of a conserved DNA module involved in light responsiveness
SlADK2	Solyc02g093990.3.1	Box 4	ATTAAT	856	6	-	Petroselinum crispum	part of a conserved DNA module involved in light responsiveness
SlADK2	Solyc02g093990.3.1	Box 4	ATTAAT	1201	6	-	Petroselinum crispum	part of a conserved DNA module involved in light responsiveness
SlADK2	Solyc02g093990.3.1	Box 4	ATTAAT	1346	6	-	Petroselinum crispum	part of a conserved DNA module involved in light responsiveness
SlADK2	Solyc02g093990.3.1	TGACG-motif	TGACG	22	5	+	Hordeum vulgare	cis-acting regulatory element involved in the MeJA-responsiveness
SlADK2	Solyc02g093990.3.1	MYC	CAATTG	120	6	+	Arabidopsis thaliana
SlADK2	Solyc02g093990.3.1	MYC	CATTTG	358	6	-	Arabidopsis thaliana
SlADK2	Solyc02g093990.3.1	W box	TTGACC	420	6	-	Arabidopsis thaliana
SlADK2	Solyc02g093990.3.1	WUN-motif	TTATTACAT	1257	9	+	Nicotiana glutinosa
SlADK2	Solyc02g093990.3.1	E2Fb	TTTGCCGC	94	8	-	Nicotiana tabacum
SlADK2	Solyc02g093990.3.1	Myb	TAACTG	1220	6	-	Arabidopsis thaliana
SlADK2	Solyc02g093990.3.1	Myb	CAACTG	1425	6	-	Arabidopsis thaliana
SlADK2	Solyc02g093990.3.1	AC-I	(T/C)C(T/C)(C/T)ACC(T/C)ACC	489	8.5	-	Phaseolus vulgaris
SlADK2	Solyc02g093990.3.1	AT-rich element	ATAGAAATCAA	970	10	+	Glycine max	binding site of AT-rich DNA binding protein (ATBP-1)
SlADK2	Solyc02g093990.3.1	GATA-motif	AAGATAAGATT	723	10	-	Arabidopsis thaliana	part of a light responsive element
SlADK2	Solyc02g093990.3.1	O2-site	GATGATGTGG	597	9	+	Zea mays	cis-acting regulatory element involved in zein metabolism regulation
SlADK2	Solyc02g093990.3.1	G-box	GCCACGTGGA	528	9	-	Arabidopsis thaliana	cis-acting regulatory element involved in light responsiveness
SlADK2	Solyc02g093990.3.1	G-box	CACGAC	1458	6	-	Zea mays	cis-acting regulatory element involved in light responsiveness
SlADK2	Solyc02g093990.3.1	GT1-motif	GGTTAA	1283	6	-	Arabidopsis thaliana	light responsive element
SlADK2	Solyc02g093990.3.1	GT1-motif	GGTTAA	1447	6	-	Arabidopsis thaliana	light responsive element
SlADK2	Solyc02g093990.3.1	MRE	AACCTAA	792	7	-	Petroselinum crispum	MYB binding site involved in light responsiveness
SlADK2	Solyc02g093990.3.1	MRE	AACCTAA	1118	7	+	Petroselinum crispum	MYB binding site involved in light responsiveness
SlADK2	Solyc02g093990.3.1	HD-Zip 1	CAAT(A/T)ATTG	945	8.5	-	Arabidopsis thaliana	element involved in differentiation of the palisade mesophyll cells
SlADK2	Solyc02g093990.3.1	ARE	AAACCA	1340	6	+	Zea mays	cis-acting regulatory element essential for the anaerobic induction
SlADK2	Solyc02g093990.3.1	MYB	CAACAG	315	6	+	Arabidopsis thaliana
SlADK2	Solyc02g093990.3.1	MYB	CAACAG	370	6	-	Arabidopsis thaliana
SlADK2	Solyc02g093990.3.1	MBS	CAACTG	1425	6	-	Arabidopsis thaliana	MYB binding site involved in drought-inducibility
SlADK2	Solyc02g093990.3.1	TGA-element	AACGAC	1040	6	-	Brassica oleracea	auxin-responsive element
SlADK2	Solyc02g093990.3.1	Myb-binding site	CAACAG	315	6	+	Nicotiana tabacum
SlADK2	Solyc02g093990.3.1	Myb-binding site	CAACAG	370	6	-	Nicotiana tabacum
SlADK2	Solyc02g093990.3.1	ABRE	GCCGCGTGGC	528	9	+	Oryza sativa	cis-acting element involved in the abscisic acid responsiveness
SlADK3	Solyc03g005050.3.1	W box	TTGACC	1103	6	-	Arabidopsis thaliana
SlADK3	Solyc03g005050.3.1	ERE	ATTTTAAA	380	8	+	Nicotiana glutinos
SlADK3	Solyc03g005050.3.1	ERE	ATTTTAAA	1077	8	-	Nicotiana glutinos
SlADK3	Solyc03g005050.3.1	MYB-like sequence	TAACCA	16	6	+	Arabidopsis thaliana
SlADK3	Solyc03g005050.3.1	MYB-like sequence	TAACCA	804	6	-	Arabidopsis thaliana
SlADK3	Solyc03g005050.3.1	CCGTCC-box	CCGTCC	540	6	-	Petroselinum hortense
SlADK3	Solyc03g005050.3.1	AAGAA-motif	gGTAAAGAAA	817	9	-	Avena sativa
SlADK3	Solyc03g005050.3.1	Box 4	ATTAAT	369	6	+	Petroselinum crispum	part of a conserved DNA module involved in light responsiveness
SlADK3	Solyc03g005050.3.1	Box 4	ATTAAT	453	6	+	Petroselinum crispum	part of a conserved DNA module involved in light responsiveness
SlADK3	Solyc03g005050.3.1	Box 4	ATTAAT	484	6	+	Petroselinum crispum	part of a conserved DNA module involved in light responsiveness
SlADK3	Solyc03g005050.3.1	G-Box	CACGTG	1285	6	-	Pisum sativum	cis-acting regulatory element involved in light responsiveness
SlADK3	Solyc03g005050.3.1	G-Box	CACGTG	1414	6	-	Pisum sativum	cis-acting regulatory element involved in light responsiveness
SlADK3	Solyc03g005050.3.1	G-box	tgACACGTGGCA	1282	11	-	Lycopersicon esculentum	cis-acting regulatory element involved in light responsiveness
SlADK3	Solyc03g005050.3.1	G-box	ACACGTGT	1284	8	-	Brassica napus	cis-acting regulatory element involved in light responsiveness
SlADK3	Solyc03g005050.3.1	G-box	CACGTG	1285	6	-	Arabidopsis thaliana	cis-acting regulatory element involved in light responsiveness
SlADK3	Solyc03g005050.3.1	G-box	CACGAC	1310	6	-	Zea mays	cis-acting regulatory element involved in light responsiveness
SlADK3	Solyc03g005050.3.1	G-box	tgACACGTGGCA	1411	11	-	Lycopersicon esculentum	cis-acting regulatory element involved in light responsiveness
SlADK3	Solyc03g005050.3.1	G-box	ACACGTGT	1413	8	-	Brassica napus	cis-acting regulatory element involved in light responsiveness
SlADK3	Solyc03g005050.3.1	G-box	CACGTG	1414	6	-	Arabidopsis thaliana	cis-acting regulatory element involved in light responsiveness
SlADK3	Solyc03g005050.3.1	CCGTCC motif	CCGTCC	540	6	-	Nicotiana tabacum
SlADK3	Solyc03g005050.3.1	MRE	AACCTAA	320	7	+	Petroselinum crispum	MYB binding site involved in light responsiveness
SlADK3	Solyc03g005050.3.1	LTR	CCGAAA	957	6	-	Hordeum vulgare	cis-acting element involved in low-temperature responsiveness
SlADK3	Solyc03g005050.3.1	MYB	TAACCA	16	6	+	Arabidopsis thaliana
SlADK3	Solyc03g005050.3.1	MYB	CAACAG	661	6	-	Arabidopsis thaliana
SlADK3	Solyc03g005050.3.1	MYB	TAACCA	804	6	-	Arabidopsis thaliana
SlADK3	Solyc03g005050.3.1	GA-motif	ATAGATAA	688	8	+	Arabidopsis thaliana	part of a light responsive element
SlADK3	Solyc03g005050.3.1	TCA-element	CCATCTTTTT	131	9	-	Nicotiana tabacum	cis-acting element involved in salicylic acid responsiveness
SlADK3	Solyc03g005050.3.1	MYC	CATTTG	1466	6	-	Arabidopsis thaliana
SlADK3	Solyc03g005050.3.1	TGA-element	AACGAC	587	6	-	Brassica oleracea	auxin-responsive element
SlADK3	Solyc03g005050.3.1	ABRE	CGCACGTGTC	988	9	-	Hordeum vulgare	cis-acting element involved in the abscisic acid responsiveness
SlADK3	Solyc03g005050.3.1	ABRE	TACGGTC	1100	7	+	Arabidopsis thaliana	cis-acting element involved in the abscisic acid responsiveness
SlADK3	Solyc03g005050.3.1	ABRE	GACACGTGGC	1283	9	-	Triticum aestivum	cis-acting element involved in the abscisic acid responsiveness
SlADK3	Solyc03g005050.3.1	ABRE	CACGTG	1285	6	-	Arabidopsis thaliana	cis-acting element involved in the abscisic acid responsiveness
SlADK3	Solyc03g005050.3.1	ABRE	ACGTG	1286	5	+	Arabidopsis thaliana	cis-acting element involved in the abscisic acid responsiveness
SlADK3	Solyc03g005050.3.1	ABRE	GACACGTGGC	1412	9	-	Triticum aestivum	cis-acting element involved in the abscisic acid responsiveness
SlADK3	Solyc03g005050.3.1	ABRE	CACGTG	1414	6	-	Arabidopsis thaliana	cis-acting element involved in the abscisic acid responsiveness
SlADK3	Solyc03g005050.3.1	ABRE	ACGTG	1415	5	+	Arabidopsis thaliana	cis-acting element involved in the abscisic acid responsiveness
SlADK3	Solyc03g005050.3.1	Myb-binding site	CAACAG	661	6	-	Nicotiana tabacum
SlADK3	Solyc03g005050.3.1	RY-element	CATGCATG	632	8	+	Helianthus annuus	cis-acting regulatory element involved in seed-specific regulation
SlADK4	Solyc03g083610.3.1	ERE	ATTTTAAA	1379	8	+	Nicotiana glutinos
SlADK4	Solyc03g083610.3.1	TC-rich repeats	ATTCTCTAAC	10	9	+	Nicotiana tabacum	cis-acting element involved in defense and stress responsiveness
SlADK4	Solyc03g083610.3.1	TC-rich repeats	ATTCTCTAAC	163	9	+	Nicotiana tabacum	cis-acting element involved in defense and stress responsiveness
SlADK4	Solyc03g083610.3.1	AAGAA-motif	GAAAGAA	230	7	-	Avena sativa
SlADK4	Solyc03g083610.3.1	I-box	gGATAAGGTG	479	9	-	Zea mays	part of a light responsive element
SlADK4	Solyc03g083610.3.1	Box 4	ATTAAT	713	6	+	Petroselinum crispum	part of a conserved DNA module involved in light responsiveness
SlADK4	Solyc03g083610.3.1	Box 4	ATTAAT	797	6	-	Petroselinum crispum	part of a conserved DNA module involved in light responsiveness
SlADK4	Solyc03g083610.3.1	Box 4	ATTAAT	801	6	-	Petroselinum crispum	part of a conserved DNA module involved in light responsiveness
SlADK4	Solyc03g083610.3.1	Box 4	ATTAAT	1174	6	-	Petroselinum crispum	part of a conserved DNA module involved in light responsiveness
SlADK4	Solyc03g083610.3.1	Box 4	ATTAAT	1215	6	-	Petroselinum crispum	part of a conserved DNA module involved in light responsiveness
SlADK4	Solyc03g083610.3.1	Myb	TAACTG	169	6	+	Arabidopsis thaliana
SlADK4	Solyc03g083610.3.1	Myb	TAACTG	639	6	+	Arabidopsis thaliana
SlADK4	Solyc03g083610.3.1	box S	AGCCACC	575	7	-	Arabidopsis thaliana
SlADK4	Solyc03g083610.3.1	AT-rich element	ATAGAAATCAA	907	10	+	Glycine max	binding site of AT-rich DNA binding protein (ATBP-1)
SlADK4	Solyc03g083610.3.1	G-Box	CACGTGAAA	325	9	-	Pisum sativum	cis-acting regulatory element involved in light responsiveness
SlADK4	Solyc03g083610.3.1	G-Box	CACGTG	328	6	+	Pisum sativum	cis-acting regulatory element involved in light responsiveness
SlADK4	Solyc03g083610.3.1	G-Box	CACGTG	667	6	+	Pisum sativum	cis-acting regulatory element involved in light responsiveness
SlADK4	Solyc03g083610.3.1	AuxRR-core	GGTCCAT	1089	7	-	Nicotiana tabacum	cis-acting regulatory element involved in auxin responsiveness
SlADK4	Solyc03g083610.3.1	G-box	TAACACGTAG	265	9	+	Brassica oleracea	cis-acting regulatory element involved in light responsiveness
SlADK4	Solyc03g083610.3.1	G-box	CACGTG	328	6	+	Arabidopsis thaliana	cis-acting regulatory element involved in light responsiveness
SlADK4	Solyc03g083610.3.1	G-box	CACGTG	667	6	+	Arabidopsis thaliana	cis-acting regulatory element involved in light responsiveness
SlADK4	Solyc03g083610.3.1	MYB	CAACCA	1095	6	+	Arabidopsis thaliana
SlADK4	Solyc03g083610.3.1	MYC	CATTTG	538	6	-	Arabidopsis thaliana
SlADK4	Solyc03g083610.3.1	ABRE	CACGTG	328	6	+	Arabidopsis thaliana	cis-acting element involved in the abscisic acid responsiveness
SlADK4	Solyc03g083610.3.1	ABRE	ACGTG	329	5	+	Arabidopsis thaliana	cis-acting element involved in the abscisic acid responsiveness
SlADK4	Solyc03g083610.3.1	ABRE	CACGTG	667	6	+	Arabidopsis thaliana	cis-acting element involved in the abscisic acid responsiveness
SlADK4	Solyc03g083610.3.1	ABRE	ACGTG	668	5	+	Arabidopsis thaliana	cis-acting element involved in the abscisic acid responsiveness
SlADK5	Solyc03g111200.3.1	STRE	AGGGG	873	5	+	Arabidopsis thaliana
SlADK5	Solyc03g111200.3.1	AAGAA-motif	GAAAGAA	1225	7	-	Avena sativa
SlADK5	Solyc03g111200.3.1	AE-box	AGAAACAA	377	8	-	Arabidopsis thaliana	part of a module for light response
SlADK5	Solyc03g111200.3.1	Box 4	ATTAAT	1027	6	-	Petroselinum crispum	part of a conserved DNA module involved in light responsiveness
SlADK5	Solyc03g111200.3.1	Box 4	ATTAAT	1089	6	-	Petroselinum crispum	part of a conserved DNA module involved in light responsiveness
SlADK5	Solyc03g111200.3.1	Box 4	ATTAAT	1279	6	-	Petroselinum crispum	part of a conserved DNA module involved in light responsiveness
SlADK5	Solyc03g111200.3.1	Myb	TAACTG	205	6	-	Arabidopsis thaliana
SlADK5	Solyc03g111200.3.1	TCCC-motif	TCTCCCT	233	7	-	Spinacia oleracea	part of a light responsive element
SlADK5	Solyc03g111200.3.1	G-Box	CACGTT	495	6	+	Pisum sativum	cis-acting regulatory element involved in light responsiveness
SlADK5	Solyc03g111200.3.1	G-box	TAAACGTG	495	8	-	Brassica oleracea	cis-acting regulatory element involved in light responsiveness
SlADK5	Solyc03g111200.3.1	G-box	CACGAC	749	6	+	Zea mays	cis-acting regulatory element involved in light responsiveness
SlADK5	Solyc03g111200.3.1	MRE	AACCTAA	535	7	-	Petroselinum crispum	MYB binding site involved in light responsiveness
SlADK5	Solyc03g111200.3.1	ARE	AAACCA	147	6	+	Zea mays	cis-acting regulatory element essential for the anaerobic induction
SlADK5	Solyc03g111200.3.1	ARE	AAACCA	1260	6	+	Zea mays	cis-acting regulatory element essential for the anaerobic induction
SlADK5	Solyc03g111200.3.1	LTR	CCGAAA	1207	6	-	Hordeum vulgare	cis-acting element involved in low-temperature responsiveness
SlADK5	Solyc03g111200.3.1	MYB	CAACCA	142	6	+	Arabidopsis thaliana
SlADK5	Solyc03g111200.3.1	Myc	TCTCTTA	250	7	-	Arabidopsis thaliana
SlADK5	Solyc03g111200.3.1	Myc	TCTCTTA	564	7	+	Arabidopsis thaliana
SlADK5	Solyc03g111200.3.1	TCA-element	CCATCTTTTT	83	9	-	Nicotiana tabacum	cis-acting element involved in salicylic acid responsiveness
SlADK5	Solyc03g111200.3.1	TCT-motif	TCTTAC	249	6	-	Arabidopsis thaliana	part of a light responsive element
SlADK5	Solyc03g111200.3.1	ABRE	AACCCGG	359	7	-	Arabidopsis thaliana	cis-acting element involved in the abscisic acid responsiveness
SlADK5	Solyc03g111200.3.1	ABRE	ACGTG	495	5	-	Arabidopsis thaliana	cis-acting element involved in the abscisic acid responsiveness
SlADK6	Solyc04g049690.3.1	ERE	ATTTTAAA	204	8	+	Nicotiana glutinos
SlADK6	Solyc04g049690.3.1	ERE	ATTTCATA	482	8	-	Nicotiana glutinos
SlADK6	Solyc04g049690.3.1	ERE	ATTTCATA	1003	8	-	Nicotiana glutinos
SlADK6	Solyc04g049690.3.1	ABRE3a	TACGTG	494	6	-	Zea mays
SlADK6	Solyc04g049690.3.1	ABRE3a	TACGTG	1236	6	+	Zea mays
SlADK6	Solyc04g049690.3.1	Box 4	ATTAAT	1	6	+	Petroselinum crispum	part of a conserved DNA module involved in light responsiveness
SlADK6	Solyc04g049690.3.1	Box 4	ATTAAT	453	6	+	Petroselinum crispum	part of a conserved DNA module involved in light responsiveness
SlADK6	Solyc04g049690.3.1	MYB recognition site	CCGTTG	158	6	-	Arabidopsis thaliana
SlADK6	Solyc04g049690.3.1	Myb	TAACTG	1262	6	+	Arabidopsis thaliana
SlADK6	Solyc04g049690.3.1	TCCC-motif	TCTCCCT	650	7	+	Spinacia oleracea	part of a light responsive element
SlADK6	Solyc04g049690.3.1	GATA-motif	AAGGATAAGG	1430	9	-	Solanum tuberosum	part of a light responsive element
SlADK6	Solyc04g049690.3.1	G-box	TACGTG	494	6	-	Arabidopsis thaliana	cis-acting regulatory element involved in light responsiveness
SlADK6	Solyc04g049690.3.1	G-box	TACGTG	1236	6	+	Arabidopsis thaliana	cis-acting regulatory element involved in light responsiveness
SlADK6	Solyc04g049690.3.1	DRE1	ACCGAGA	1357	7	-	Zea mays
SlADK6	Solyc04g049690.3.1	ARE	AAACCA	629	6	+	Zea mays	cis-acting regulatory element essential for the anaerobic induction
SlADK6	Solyc04g049690.3.1	CCAAT-box	CAACGG	158	6	+	Hordeum vulgare	MYBHv1 binding site
SlADK6	Solyc04g049690.3.1	ABRE4	CACGTA	494	6	+	Zea mays
SlADK6	Solyc04g049690.3.1	ABRE4	CACGTA	1236	6	-	Zea mays
SlADK6	Solyc04g049690.3.1	MYB	CAACAG	58	6	+	Arabidopsis thaliana
SlADK6	Solyc04g049690.3.1	Myc	TCTCTTA	933	7	-	Arabidopsis thaliana
SlADK6	Solyc04g049690.3.1	chs-Unit 1 m1	ACCTAACCCGG	137	10	-	Zea mays	part of a light responsive element
SlADK6	Solyc04g049690.3.1	MYC	CATGTG	505	6	-	Arabidopsis thaliana
SlADK6	Solyc04g049690.3.1	MYC	CATTTG	633	6	+	Arabidopsis thaliana
SlADK6	Solyc04g049690.3.1	MYC	CATGTG	781	6	-	Arabidopsis thaliana
SlADK6	Solyc04g049690.3.1	MYC	CATTTG	831	6	-	Arabidopsis thaliana
SlADK6	Solyc04g049690.3.1	MYC	CATTTG	1039	6	-	Arabidopsis thaliana
SlADK6	Solyc04g049690.3.1	MYC	CATTTG	1066	6	-	Arabidopsis thaliana
SlADK6	Solyc04g049690.3.1	TCT-motif	TCTTAC	932	6	-	Arabidopsis thaliana	part of a light responsive element
SlADK6	Solyc04g049690.3.1	TCT-motif	TCTTAC	1487	6	+	Arabidopsis thaliana	part of a light responsive element
SlADK6	Solyc04g049690.3.1	ABRE	AACCCGG	137	7	-	Arabidopsis thaliana	cis-acting element involved in the abscisic acid responsiveness
SlADK6	Solyc04g049690.3.1	ABRE	ACGTG	494	5	-	Arabidopsis thaliana	cis-acting element involved in the abscisic acid responsiveness
SlADK6	Solyc04g049690.3.1	ABRE	ACGTG	1237	5	+	Arabidopsis thaliana	cis-acting element involved in the abscisic acid responsiveness
SlADK6	Solyc04g049690.3.1	Myb-binding site	CAACAG	58	6	+	Nicotiana tabacum
SlADK7	Solyc05g014980.3.1	CGTCA-motif	CGTCA	829	5	+	Hordeum vulgare	cis-acting regulatory element involved in the MeJA-responsiveness
SlADK7	Solyc05g014980.3.1	CGTCA-motif	CGTCA	1453	5	+	Hordeum vulgare	cis-acting regulatory element involved in the MeJA-responsiveness
SlADK7	Solyc05g014980.3.1	AAGAA-motif	GAAAGAA	1464	7	-	Avena sativa
SlADK7	Solyc05g014980.3.1	Box 4	ATTAAT	291	6	+	Petroselinum crispum	part of a conserved DNA module involved in light responsiveness
SlADK7	Solyc05g014980.3.1	Box 4	ATTAAT	306	6	+	Petroselinum crispum	part of a conserved DNA module involved in light responsiveness
SlADK7	Solyc05g014980.3.1	Box 4	ATTAAT	454	6	+	Petroselinum crispum	part of a conserved DNA module involved in light responsiveness
SlADK7	Solyc05g014980.3.1	Box 4	ATTAAT	996	6	-	Petroselinum crispum	part of a conserved DNA module involved in light responsiveness
SlADK7	Solyc05g014980.3.1	Box 4	ATTAAT	1011	6	-	Petroselinum crispum	part of a conserved DNA module involved in light responsiveness
SlADK7	Solyc05g014980.3.1	TGACG-motif	TGACG	829	5	-	Hordeum vulgare	cis-acting regulatory element involved in the MeJA-responsiveness
SlADK7	Solyc05g014980.3.1	TGACG-motif	TGACG	1453	5	-	Hordeum vulgare	cis-acting regulatory element involved in the MeJA-responsiveness
SlADK7	Solyc05g014980.3.1	GATA-motif	GATAGGA	1407	7	+	Arabidopsis thaliana	part of a light responsive element
SlADK7	Solyc05g014980.3.1	MYB	CAACAG	784	6	+	Arabidopsis thaliana
SlADK7	Solyc05g014980.3.1	TATC-box	TATCCCA	1086	7	+	Oryza sativa	cis-acting element involved in gibberellin-responsiveness
SlADK7	Solyc05g014980.3.1	TCT-motif	TCTTAC	1113	6	-	Arabidopsis thaliana	part of a light responsive element
SlADK7	Solyc05g014980.3.1	TCT-motif	TCTTAC	1200	6	-	Arabidopsis thaliana	part of a light responsive element
SlADK7	Solyc05g014980.3.1	Myb-binding site	CAACAG	784	6	+	Nicotiana tabacum
SlADK8	Solyc06g065270.3.1	ERE	ATTTTAAA	48	8	+	Nicotiana glutinos
SlADK8	Solyc06g065270.3.1	MYB-like sequence	TAACCA	1015	6	+	Arabidopsis thaliana
SlADK8	Solyc06g065270.3.1	MYB-like sequence	TAACCA	1081	6	+	Arabidopsis thaliana
SlADK8	Solyc06g065270.3.1	chs-CMA1a	TTACTTAA	300	8	-	Daucus carota	part of a light responsive element
SlADK8	Solyc06g065270.3.1	CAT-box	GCCACT	1186	6	+	Arabidopsis thaliana	cis-acting regulatory element related to meristem expression
SlADK8	Solyc06g065270.3.1	TC-rich repeats	GTTTTCTTAC	747	10	-	Nicotiana tabacum	cis-acting element involved in defense and stress responsiveness
SlADK8	Solyc06g065270.3.1	AE-box	AGAAACAA	318	8	+	Arabidopsis thaliana	part of a module for light response
SlADK8	Solyc06g065270.3.1	AE-box	AGAAACTT	703	8	-	Arabidopsis thaliana	part of a module for light response
SlADK8	Solyc06g065270.3.1	AE-box	AGAAACAA	802	8	+	Arabidopsis thaliana	part of a module for light response
SlADK8	Solyc06g065270.3.1	I-box	atGATAAGGTC	687	10	-	Helianthus annuus	part of a light responsive element
SlADK8	Solyc06g065270.3.1	Box 4	ATTAAT	284	6	+	Petroselinum crispum	part of a conserved DNA module involved in light responsiveness
SlADK8	Solyc06g065270.3.1	Box 4	ATTAAT	1312	6	-	Petroselinum crispum	part of a conserved DNA module involved in light responsiveness
SlADK8	Solyc06g065270.3.1	Myb	TAACTG	761	6	-	Arabidopsis thaliana
SlADK8	Solyc06g065270.3.1	GATA-motif	GATAGGA	965	7	-	Arabidopsis thaliana	part of a light responsive element
SlADK8	Solyc06g065270.3.1	GT1-motif	GGTTAA	1014	6	-	Arabidopsis thaliana	light responsive element
SlADK8	Solyc06g065270.3.1	GT1-motif	GGTTAA	1493	6	-	Arabidopsis thaliana	light responsive element
SlADK8	Solyc06g065270.3.1	WRE3	CCACCT	1018	6	+	Pisum sativum
SlADK8	Solyc06g065270.3.1	LAMP-element	CTTTATCA	61	8	+	Pisum sativum	part of a light responsive element
SlADK8	Solyc06g065270.3.1	LAMP-element	CTTTATCA	689	8	+	Pisum sativum	part of a light responsive element
SlADK8	Solyc06g065270.3.1	ARE	AAACCA	1086	6	+	Zea mays	cis-acting regulatory element essential for the anaerobic induction
SlADK8	Solyc06g065270.3.1	MYB	TAACCA	1015	6	+	Arabidopsis thaliana
SlADK8	Solyc06g065270.3.1	MYB	TAACCA	1081	6	+	Arabidopsis thaliana
SlADK8	Solyc06g065270.3.1	Myc	TCTCTTA	204	7	-	Arabidopsis thaliana
SlADK8	Solyc06g065270.3.1	MYC	CATTTG	490	6	-	Arabidopsis thaliana
SlADK8	Solyc06g065270.3.1	MYC	CATGTG	525	6	+	Arabidopsis thaliana
SlADK8	Solyc06g065270.3.1	TCT-motif	TCTTAC	747	6	-	Arabidopsis thaliana	part of a light responsive element
SlADK8	Solyc06g075310.3.1	W box	TTGACC	173	6	+	Arabidopsis thaliana
SlADK8	Solyc06g075310.3.1	ACE	CTAACGTATT	604	9	+	Petroselinum crispum	cis-acting element involved in light responsiveness
SlADK8	Solyc06g075310.3.1	CGTCA-motif	CGTCA	1011	5	+	Hordeum vulgare	cis-acting regulatory element involved in the MeJA-responsiveness
SlADK8	Solyc06g075310.3.1	Sp1	GGGCGG	1440	6	+	Oryza sativa	light responsive element
SlADK8	Solyc06g075310.3.1	WUN-motif	AAATTTCCT	347	9	-	Brassica oleracea	wound-responsive element
SlADK8	Solyc06g075310.3.1	WUN-motif	CAATTACAT	1389	9	-	Nicotiana glutinosa
SlADK8	Solyc06g075310.3.1	AAGAA-motif	GAAAGAA	1429	7	+	Avena sativa
SlADK8	Solyc06g075310.3.1	TCA	TCATCTTCAT	1025	9	-	Pisum sativum
SlADK8	Solyc06g075310.3.1	GARE-motif	TCTGTTG	1424	7	-	Brassica oleracea	gibberellin-responsive element
SlADK8	Solyc06g075310.3.1	I-box	TGATAATGT	44	9	-	Solanum tuberosum	part of a light responsive element
SlADK8	Solyc06g075310.3.1	Box 4	ATTAAT	1299	6	-	Petroselinum crispum	part of a conserved DNA module involved in light responsiveness
SlADK8	Solyc06g075310.3.1	Myb	CAACTG	51	6	+	Arabidopsis thaliana
SlADK8	Solyc06g075310.3.1	TGACG-motif	TGACG	1011	5	-	Hordeum vulgare	cis-acting regulatory element involved in the MeJA-responsiveness
SlADK8	Solyc06g075310.3.1	AC-I	(T/C)C(T/C)(C/T)ACC(T/C)ACC	883	9	-	Phaseolus vulgaris
SlADK8	Solyc06g075310.3.1	G-Box	CACGTT	981	6	-	Pisum sativum	cis-acting regulatory element involved in light responsiveness
SlADK8	Solyc06g075310.3.1	O2-site	GATGATGTGG	42	9	-	Zea mays	cis-acting regulatory element involved in zein metabolism regulation
SlADK8	Solyc06g075310.3.1	O2-site	GTTGACGTGA	658	9	-	Zea mays	cis-acting regulatory element involved in zein metabolism regulation
SlADK8	Solyc06g075310.3.1	MYB	CAACAG	150	6	+	Arabidopsis thaliana
SlADK8	Solyc06g075310.3.1	MYB	CAACAG	430	6	+	Arabidopsis thaliana
SlADK8	Solyc06g075310.3.1	MYB	CAACAG	1424	6	+	Arabidopsis thaliana
SlADK8	Solyc06g075310.3.1	MBS	CAACTG	51	6	+	Arabidopsis thaliana	MYB binding site involved in drought-inducibility
SlADK8	Solyc06g075310.3.1	GA-motif	ATAGATAA	1287	8	-	Arabidopsis thaliana	part of a light responsive element
SlADK8	Solyc06g075310.3.1	chs-CMA2a	TCACTTGA	277	8	+	Petroselinum crispum	part of a light responsive element
SlADK8	Solyc06g075310.3.1	MYC	CAATTG	195	6	+	Arabidopsis thaliana
SlADK8	Solyc06g075310.3.1	MYC	CATTTG	232	6	+	Arabidopsis thaliana
SlADK8	Solyc06g075310.3.1	MYC	CATTTG	729	6	-	Arabidopsis thaliana
SlADK8	Solyc06g075310.3.1	MYC	CATTTG	819	6	-	Arabidopsis thaliana
SlADK8	Solyc06g075310.3.1	MYC	CATTTG	936	6	+	Arabidopsis thaliana
SlADK8	Solyc06g075310.3.1	MYC	CATTTG	1209	6	+	Arabidopsis thaliana
SlADK8	Solyc06g075310.3.1	MYC	CATTTG	1325	6	+	Arabidopsis thaliana
SlADK8	Solyc06g075310.3.1	TCT-motif	TCTTAC	161	6	-	Arabidopsis thaliana	part of a light responsive element
SlADK8	Solyc06g075310.3.1	TCT-motif	TCTTAC	468	6	-	Arabidopsis thaliana	part of a light responsive element
SlADK8	Solyc06g075310.3.1	ABRE	ACGTG	982	5	+	Arabidopsis thaliana	cis-acting element involved in the abscisic acid responsiveness
SlADK8	Solyc06g075310.3.1	ABRE	GCAACGTGTC	1198	9	-	Hordeum vulgare	cis-acting element involved in the abscisic acid responsiveness
SlADK8	Solyc06g075310.3.1	Myb-binding site	CAACAG	150	6	+	Nicotiana tabacum
SlADK8	Solyc06g075310.3.1	Myb-binding site	CAACAG	430	6	+	Nicotiana tabacum
SlADK8	Solyc06g075310.3.1	Myb-binding site	CAACAG	1424	6	+	Nicotiana tabacum
SlADK9	Solyc08g077300.3.1	W box	TTGACC	1460	6	+	Arabidopsis thaliana
SlADK9	Solyc08g077300.3.1	ERE	ATTTTAAA	1391	8	+	Nicotiana glutinos
SlADK9	Solyc08g077300.3.1	ERE	ATTTTAAA	1393	8	-	Nicotiana glutinos
SlADK9	Solyc08g077300.3.1	MYB-like sequence	TAACCA	1487	6	-	Arabidopsis thaliana
SlADK9	Solyc08g077300.3.1	ABRE3a	TACGTG	882	6	+	Zea mays
SlADK9	Solyc08g077300.3.1	Box 4	ATTAAT	52	6	+	Petroselinum crispum	part of a conserved DNA module involved in light responsiveness
SlADK9	Solyc08g077300.3.1	Box 4	ATTAAT	367	6	+	Petroselinum crispum	part of a conserved DNA module involved in light responsiveness
SlADK9	Solyc08g077300.3.1	Box 4	ATTAAT	876	6	-	Petroselinum crispum	part of a conserved DNA module involved in light responsiveness
SlADK9	Solyc08g077300.3.1	ABRE4	CACGTA	882	6	-	Zea mays
SlADK9	Solyc08g077300.3.1	LTR	CCGAAA	680	6	+	Hordeum vulgare	cis-acting element involved in low-temperature responsiveness
SlADK9	Solyc08g077300.3.1	MYB	CAACCA	886	6	-	Arabidopsis thaliana
SlADK9	Solyc08g077300.3.1	MYB	TAACCA	1487	6	-	Arabidopsis thaliana
SlADK9	Solyc08g077300.3.1	TCA-element	CCATCTTTTT	179	9	-	Nicotiana tabacum	cis-acting element involved in salicylic acid responsiveness
SlADK9	Solyc08g077300.3.1	MYC	CATTTG	627	6	-	Arabidopsis thaliana
SlADK9	Solyc08g077300.3.1	MYC	CATTTG	839	6	+	Arabidopsis thaliana
SlADK9	Solyc08g077300.3.1	MYC	CATTTG	1129	6	-	Arabidopsis thaliana
SlADK9	Solyc08g077300.3.1	TCT-motif	TCTTAC	526	6	+	Arabidopsis thaliana	part of a light responsive element
SlADK9	Solyc08g077300.3.1	TGA-element	AACGAC	208	6	-	Brassica oleracea	auxin-responsive element
SlADK9	Solyc08g077300.3.1	ABRE	ACGTG	666	5	+	Arabidopsis thaliana	cis-acting element involved in the abscisic acid responsiveness
SlADK9	Solyc08g077300.3.1	ABRE	ACGTG	883	5	+	Arabidopsis thaliana	cis-acting element involved in the abscisic acid responsiveness
SlADK10	Solyc09g007170.3.1	MYB-like sequence	TAACCA	218	6	-	Arabidopsis thaliana
SlADK10	Solyc09g007170.3.1	CGTCA-motif	CGTCA	1321	5	+	Hordeum vulgare	cis-acting regulatory element involved in the MeJA-responsiveness
SlADK10	Solyc09g007170.3.1	as-1	TGACG	1321	5	-	Arabidopsis thaliana
SlADK10	Solyc09g007170.3.1	AAGAA-motif	gGTAAAGAAA	167	9	-	Avena sativa
SlADK10	Solyc09g007170.3.1	MBSI	TTTTTACGGTTA	1287	11	+	Petunia hybrida	MYB binding site involved in flavonoid biosynthetic genes regulation
SlADK10	Solyc09g007170.3.1	AuxRE	TGTCTCAATAAG	347	11	-	Glycine max	part of an auxin-responsive element
SlADK10	Solyc09g007170.3.1	P-box	CCTTTTG	804	7	+	Oryza sativa	gibberellin-responsive element
SlADK10	Solyc09g007170.3.1	Box 4	ATTAAT	44	6	+	Petroselinum crispum	part of a conserved DNA module involved in light responsiveness
SlADK10	Solyc09g007170.3.1	Box 4	ATTAAT	674	6	+	Petroselinum crispum	part of a conserved DNA module involved in light responsiveness
SlADK10	Solyc09g007170.3.1	Box 4	ATTAAT	1061	6	-	Petroselinum crispum	part of a conserved DNA module involved in light responsiveness
SlADK10	Solyc09g007170.3.1	TGACG-motif	TGACG	1321	5	-	Hordeum vulgare	cis-acting regulatory element involved in the MeJA-responsiveness
SlADK10	Solyc09g007170.3.1	MYC	CATTTG	651	6	-	Arabidopsis thaliana
SlADK10	Solyc09g007170.3.1	MYC	CATTTG	1361	6	+	Arabidopsis thaliana
SlADK10	Solyc09g007170.3.1	W box	TTGACC	1364	6	+	Arabidopsis thaliana
SlADK10	Solyc09g007170.3.1	chs-CMA1a	TTACTTAA	787	8	-	Daucus carota	part of a light responsive element
SlADK10	Solyc09g007170.3.1	WUN-motif	TAATTACTC	1173	9	+	Nicotiana glutinosa
SlADK10	Solyc09g007170.3.1	ABRE3a	TACGTG	908	6	-	Zea mays
SlADK10	Solyc09g007170.3.1	TC-rich repeats	ATTCTCTAAC	865	9	+	Nicotiana tabacum	cis-acting element involved in defense and stress responsiveness
SlADK10	Solyc09g007170.3.1	STRE	AGGGG	1437	5	-	Arabidopsis thaliana
SlADK10	Solyc09g007170.3.1	G-Box	CACGTT	280	6	-	Pisum sativum	cis-acting regulatory element involved in light responsiveness
SlADK10	Solyc09g007170.3.1	G-Box	CACGTT	1324	6	+	Pisum sativum	cis-acting regulatory element involved in light responsiveness
SlADK10	Solyc09g007170.3.1	G-box	TAAACGTG	278	8	+	Brassica oleracea	cis-acting regulatory element involved in light responsiveness
SlADK10	Solyc09g007170.3.1	G-box	TACGTG	908	6	-	Arabidopsis thaliana	cis-acting regulatory element involved in light responsiveness
SlADK10	Solyc09g007170.3.1	MYB	TAACCA	218	6	-	Arabidopsis thaliana
SlADK10	Solyc09g007170.3.1	ABRE4	CACGTA	908	6	+	Zea mays
SlADK10	Solyc09g007170.3.1	TCA-element	CCATCTTTTT	105	9	+	Nicotiana tabacum	cis-acting element involved in salicylic acid responsiveness
SlADK10	Solyc09g007170.3.1	TCA-element	CCATCTTTTT	557	9	-	Nicotiana tabacum	cis-acting element involved in salicylic acid responsiveness
SlADK10	Solyc09g007170.3.1	TCA-element	CCATCTTTTT	1181	9	+	Nicotiana tabacum	cis-acting element involved in salicylic acid responsiveness
SlADK10	Solyc09g007170.3.1	GA-motif	ATAGATAA	69	8	+	Arabidopsis thaliana	part of a light responsive element
SlADK10	Solyc09g007170.3.1	GA-motif	ATAGATAA	172	8	-	Arabidopsis thaliana	part of a light responsive element
SlADK10	Solyc09g007170.3.1	GA-motif	ATAGATAA	586	8	+	Arabidopsis thaliana	part of a light responsive element
SlADK10	Solyc09g007170.3.1	TGA-element	AACGAC	1118	6	-	Brassica oleracea	auxin-responsive element
SlADK10	Solyc09g007170.3.1	ABRE	ACGTG	281	5	+	Arabidopsis thaliana	cis-acting element involved in the abscisic acid responsiveness
SlADK10	Solyc09g007170.3.1	ABRE	ACGTG	908	5	-	Arabidopsis thaliana	cis-acting element involved in the abscisic acid responsiveness
SlADK10	Solyc09g007170.3.1	ABRE	ACGTG	1324	5	-	Arabidopsis thaliana	cis-acting element involved in the abscisic acid responsiveness
SlADK11	Solyc12g010380.2.1	Sp1	GGGCGG	376	6	+	Oryza sativa	light responsive element
SlADK11	Solyc12g010380.2.1	CAT-box	GCCACT	1391	6	-	Arabidopsis thaliana	cis-acting regulatory element related to meristem expression
SlADK11	Solyc12g010380.2.1	TC-rich repeats	ATTCTCTAAC	1164	9	-	Nicotiana tabacum	cis-acting element involved in defense and stress responsiveness
SlADK11	Solyc12g010380.2.1	AAGAA-motif	GAAAGAA	387	7	+	Avena sativa
SlADK11	Solyc12g010380.2.1	AAGAA-motif	GAAAGAA	1483	7	-	Avena sativa
SlADK11	Solyc12g010380.2.1	AAGAA-motif	GAAAGAA	1494	7	-	Avena sativa
SlADK11	Solyc12g010380.2.1	TCA	TCATCTTCAT	808	9	+	Pisum sativum
SlADK11	Solyc12g010380.2.1	TCA	TCATCTTCAT	811	9	+	Pisum sativum
SlADK11	Solyc12g010380.2.1	AE-box	AGAAACAA	915	8	+	Arabidopsis thaliana	part of a module for light response
SlADK11	Solyc12g010380.2.1	Box 4	ATTAAT	567	6	+	Petroselinum crispum	part of a conserved DNA module involved in light responsiveness
SlADK11	Solyc12g010380.2.1	Box 4	ATTAAT	1157	6	-	Petroselinum crispum	part of a conserved DNA module involved in light responsiveness
SlADK11	Solyc12g010380.2.1	circadian	CAAAGATATC	585	9	-	Lycopersicon esculentum	cis-acting regulatory element involved in circadian control
SlADK11	Solyc12g010380.2.1	Myb	CAACTG	520	6	-	Arabidopsis thaliana
SlADK11	Solyc12g010380.2.1	Myb	TAACTG	1445	6	-	Arabidopsis thaliana
SlADK11	Solyc12g010380.2.1	TCCC-motif	TCTCCCT	1016	7	+	Spinacia oleracea	part of a light responsive element
SlADK11	Solyc12g010380.2.1	LAMP-element	CTTTATCA	601	8	+	Pisum sativum	part of a light responsive element
SlADK11	Solyc12g010380.2.1	ARE	AAACCA	276	6	-	Zea mays	cis-acting regulatory element essential for the anaerobic induction
SlADK11	Solyc12g010380.2.1	MYB	CAACAG	244	6	+	Arabidopsis thaliana
SlADK11	Solyc12g010380.2.1	MYB	CAACCA	1099	6	+	Arabidopsis thaliana
SlADK11	Solyc12g010380.2.1	MYB	CAACCA	1174	6	+	Arabidopsis thaliana
SlADK11	Solyc12g010380.2.1	MBS	CAACTG	520	6	-	Arabidopsis thaliana	MYB binding site involved in drought-inducibility
SlADK11	Solyc12g010380.2.1	TGA-element	AACGAC	21	6	-	Brassica oleracea	auxin-responsive element
SlADK11	Solyc12g010380.2.1	TGA-element	AACGAC	947	6	-	Brassica oleracea	auxin-responsive element
SlADK11	Solyc12g010380.2.1	MYC	CATGTG	1365	6	+	Arabidopsis thaliana
SlADK11	Solyc12g010380.2.1	Myb-binding site	CAACAG	244	6	+	Nicotiana tabacum
